# Supplementary material
Source: PubMed Central journal article supplement (PMC8844948)
Supplement: NIHMS1525156-supplement-1.pdf [file NIHMS1525156-supplement-1.pdf]

**REFERENCE**

- E1. Mahapatra S, Mace EM, Minard CG, Forbes LR, Vargas-Hernandez A, Duryea TK, et al. High-resolution phenotyping identifies NK cell subsets that distinguish healthy children from adults. *PLoS One* 2017;12:e0181134.

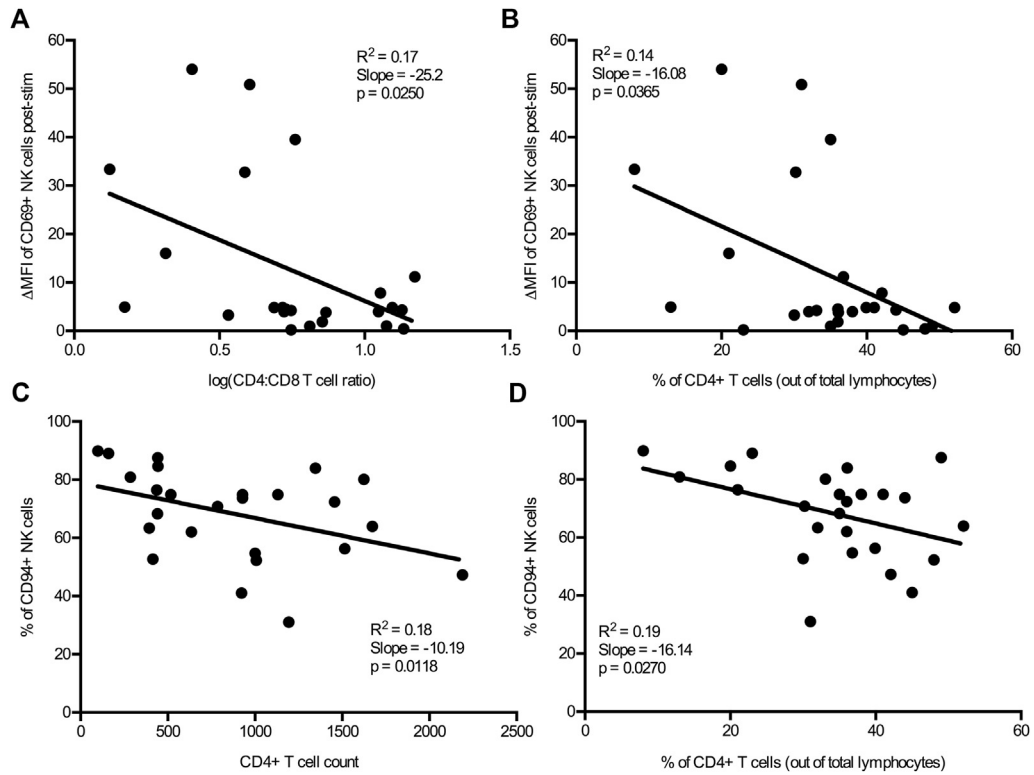

**FIG E1.** CD69 expression and frequency of CD94 on NK cells negatively associates with CD4/CD8 ratio and CD4<sup>+</sup> T cells. *stim*, Stimulation.

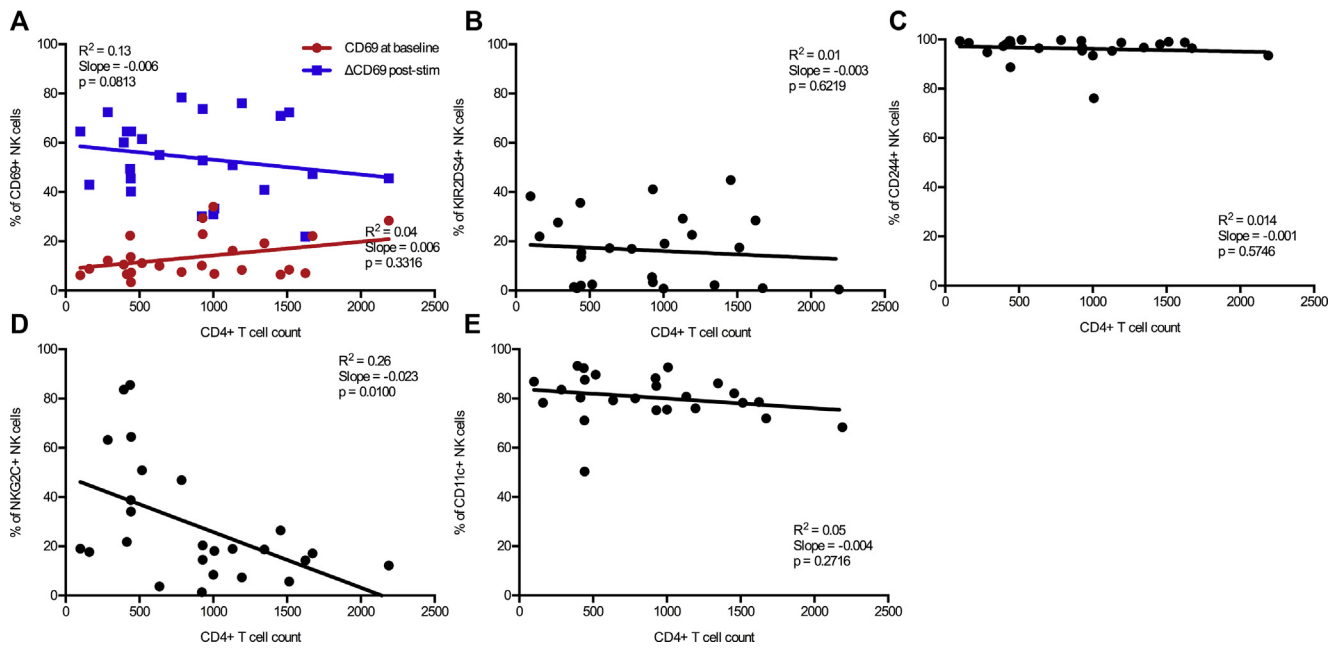

**FIG E2.** Frequency of NKG2C negatively associates with CD4<sup>+</sup> T-cell count. **A**, Relationship between CD4<sup>+</sup> T cell count and frequency of NK cells expressing CD69 in the absence of stimulation (red) or increase in CD69 after stimulation with PMA/ionomycin (blue). **B-E**, Relationship between CD4<sup>+</sup> T cell count and percentage of NK cells expressing KIR2DS4, CD244, NKG2C, and CD11c. All markers indicate surface expression. Each data point represents a donor; HIV-infected ( $n = 24$ ).  $P$  values were identified by linear regression with the coefficient of determination ( $R^2$ ) and slope defined.

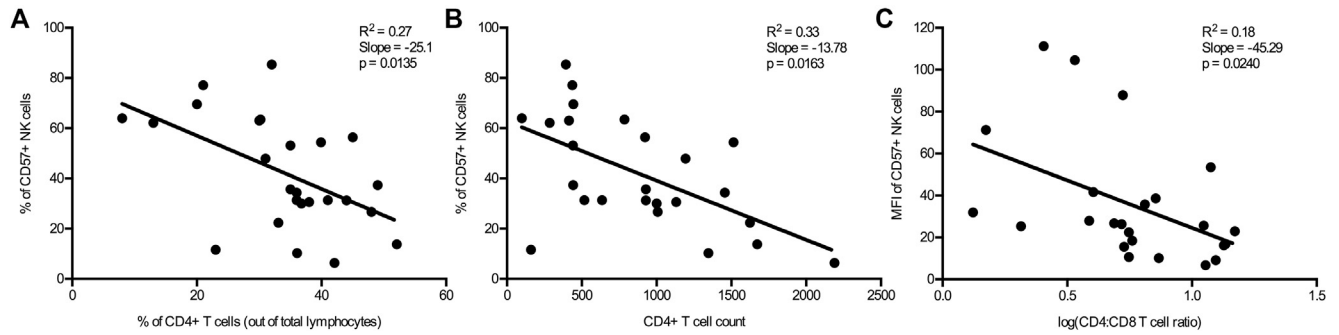

**FIG E3.** CD57 has an inverse relationship with CD4<sup>+</sup> T cells and CD4/CD8 ratio. **A-B**, Relationship between frequency of NK cells expressing CD57 and percentage of CD4<sup>+</sup> T cells and CD4<sup>+</sup> T cell count, respectively. **C**, Relationship between MFI of CD57 and CD4/CD8 T cell ratio. CD4/CD8 ratios were log transformed after a constant value of 1 was added to each ratio. Each data point represents a donor; HIV-infected ( $n = 24$ ).  $P$  values were identified by linear regression with the coefficient of determination ( $R^2$ ) and slope defined.

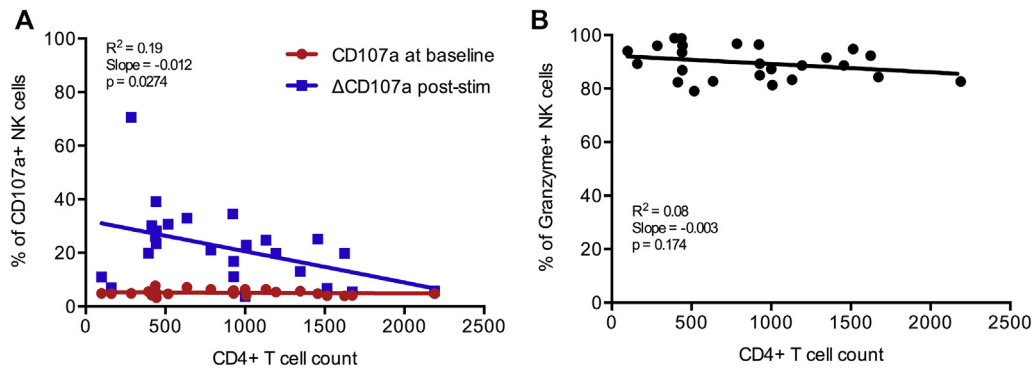

**FIG E4.** Increase in CD107a frequency on stimulation negatively associates with CD4<sup>+</sup> T-cell count. **A**, Relationship between CD4<sup>+</sup> T cell count and frequency of NK cells expressing CD107a in the absence of stimulation (red) or increase in CD107a after stimulation (blue). **B**, Relationship between CD4<sup>+</sup> T cell count and percentage of NK cells expressing granzyme in the absence of stimulation. CD107a indicates surface expression while granzyme was detected intracellularly as described in the Materials and Methods section. Each data point represents a donor; HIV-infected ( $n = 24$ ).  $P$  values were identified by linear regression with the coefficient of determination ( $R^2$ ) and slope defined.

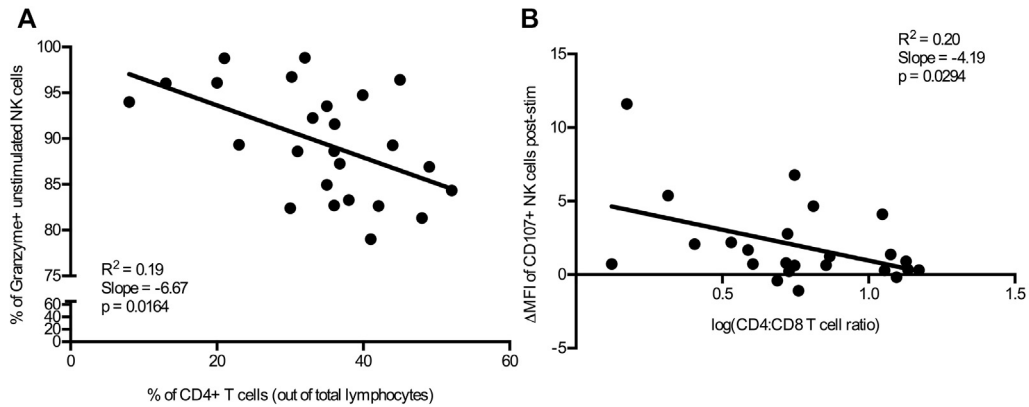

**FIG E5.** Baseline granzyme and increase in CD107a on stimulation reciprocally associate with CD4<sup>+</sup> T cells and CD4/CD8 ratio respectively. **A**, Relationship between percentage of CD4<sup>+</sup> T cells and percentage of NK cells expressing granzyme in the absence of stimulation. **B**, Relationship between change in CD107a MFI after stimulation and CD4/CD8 T cell ratio. Each data point represents a donor; HIV-infected ( $n = 24$ ).  $P$  values were identified by linear regression with the coefficient of determination ( $R^2$ ) and slope defined.

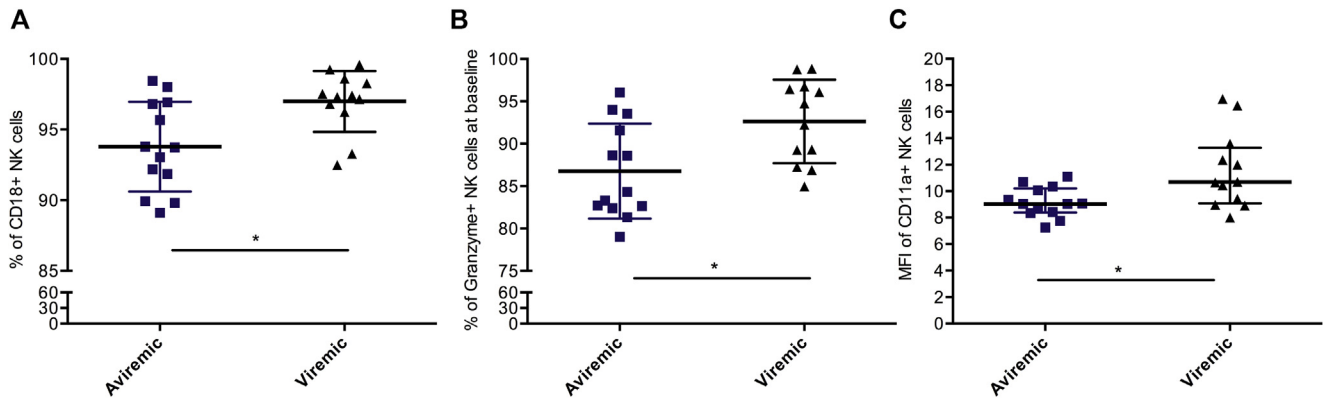

**FIG E6.** Viremic patients have increased adhesion receptors and baseline granzyme. **A-B**, Frequency of NK cells expressing CD18 and granzyme in the absence of stimulation among patients with detectable (viremic) and undetectable (aviremic) viral loads. **C**, Difference in CD11a MFI between aviremic and viremic patients. Aviremic ( $n = 13$ ) (blue); Viremic ( $n = 12$ ) (black). All data shown is mean  $\pm$  S.D. \* $P < .05$  by Wilcoxon rank-sum test.

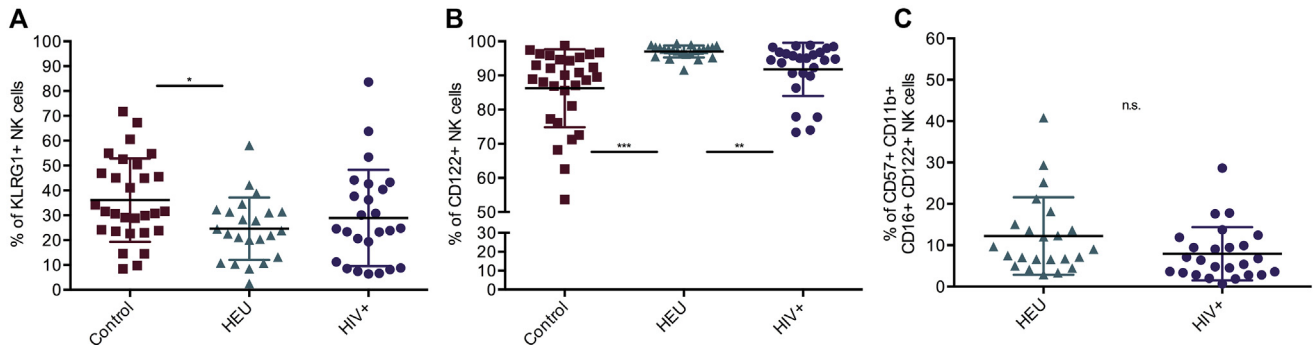

**FIG E7.** NK cells in HEU children have highest CD122 and increased frequency of mature CD57<sup>+</sup> subset. **A-C,** Frequency of NK cells individually expressing KLRG1 and CD122 and combinatorially expressing CD57, CD11b, CD16 and CD122. Each data point represents a donor; Control (n = 29) (red); HEU (n = 23) (green); HIV-infected (n = 25) (purple). All data shown is mean  $\pm$  S.D. \* $P$  < .05, \*\* $P$  < .01, \*\*\* $P$  < .001 among 3 cohorts by Kruskal-Wallis and *post-hoc* comparison by Wilcoxon rank-sum test using Bonferroni adjustment.



**TABLE E1.** NK-cell phenotyping panels\*

| <b>Panel 1:</b><br>Activating receptors | <b>Panel 2:</b><br>Adhesion/stimulatory receptors | <b>Panel 3:</b><br>Inhibitory receptors | <b>Panel 4:</b><br>Developmental markers | <b>Panel 5:</b><br>Cytokines and effector molecules |
|-----------------------------------------|---------------------------------------------------|-----------------------------------------|------------------------------------------|-----------------------------------------------------|
| <b>CD45</b>                             | <b>CD45</b>                                       | <b>CD45</b>                             | <b>CD45</b>                              | <b>CD45</b>                                         |
| <b>CD56</b>                             | <b>CD56</b>                                       | <b>CD56</b>                             | <b>CD56</b>                              | <b>CD56</b>                                         |
| <b>CD3</b>                              | <b>CD3</b>                                        | <b>CD3</b>                              | <b>CD3</b>                               | <b>CD3</b>                                          |
| CD8                                     | CD16†                                             | CD158a/KIR2DL1‡                         | IL-15R $\alpha$                          | Perforin D48                                        |
| DNAM-1†                                 | CD8                                               | CD158b/KIR2DL2-3‡                       | CD117/c-kit                              | Perforin $\delta$ G9                                |
| NKG2D†                                  | CD2†                                              | CD158e/KIR3DL1‡                         | CD127                                    | Granzyme B                                          |
| NKp30/NCR3†                             | CD244/2B4†                                        | KIR2DS4†                                | CD27                                     | CD107a/LAMP-1                                       |
| NKp44/NCR2†                             | CD18                                              | NKG2A‡                                  | CD62L                                    | TNF- $\alpha$                                       |
| NKp46/NCR1†                             | CD11a (LFA-1)                                     | NKG2C†                                  | CD94                                     | IFN- $\gamma$                                       |
| CD69                                    | CD11b (Mac-1, CR3)                                | CD94                                    | CD122                                    | IL-5                                                |
| CD25                                    | CD11c (CR4)                                       | KLRG1‡                                  | CD16                                     | IL-13                                               |
|                                         | CD54/ICAM-1                                       |                                         | CD11b                                    | IL-10                                               |
|                                         | CD28                                              |                                         | CD57                                     |                                                     |

Markers used to distinguish NK cells among PBMCs are highlighted in boldface.

*KLRG1*, Killer cell lectin-like receptor subfamily G member 1.

\*As appears in Mahapatra et al.<sup>E1</sup>

†Activating receptors.

‡Inhibitory receptors.

**TABLE E2A.** Analysis of experimental variability in controls using Bland-Altman agreement study

| NK cell panel                    | Stimulation      | NK-cell marker | Bias (%) | Control vs HIV+ | Control vs HEU |
|----------------------------------|------------------|----------------|----------|-----------------|----------------|
| Activating receptors             | No stimulation   | DNAM-1         | 9.7      | No              | No             |
|                                  |                  | CD69           | -3.02    | No              | Yes            |
|                                  |                  | NKp30          | 2.97     | NA              | Yes            |
|                                  | With stimulation | NKp46          | 2.35     | Yes             | Yes            |
|                                  |                  | NKG2C          | 0.85     | Yes             | NA             |
|                                  |                  | NKp46          | -2.35    | No              | NA             |
|                                  |                  | CD69           | 3.02     | Yes             | NA             |
| Adhesion/stimulatory receptors   |                  | CD244          | -1.22    | No              | NA             |
|                                  |                  | CD18           | -2.97    | No              | No             |
|                                  |                  | CD11b          | -3.02    | No              | NA             |
|                                  |                  | CD11c          | 3.2      | NA              | NA             |
|                                  |                  | CD2            | 1.63     | Yes             | No             |
| Developmental markers            |                  | CD16           | -0.68    | Yes             | NA             |
|                                  |                  | CD122          | 7.25     | NA              | Yes            |
| Cytokines and effector molecules | No stimulation   | IL-5           | 7.25     | No              | NA             |
|                                  |                  | CD107a         | 4.97     | Yes             | NA             |
|                                  | With stimulation | IL-5           | 7.25     | No              | NA             |
|                                  |                  | CD107a         | -4.97    | NA              | Yes            |

**TABLE E2B.**

| <b>Fluorochrome</b> | <b>Bias 1 (panel 2)</b> | <b>Bias 2 (panel 3)</b> | <b>Bias 3 (panel 4)</b> |
|---------------------|-------------------------|-------------------------|-------------------------|
| BV 650              | 2.19                    |                         | 8.58                    |
| FITC                | 1.22                    | 9.7                     | 0.23                    |
| APC                 | 2.97                    | 2.74                    | 1.56                    |
| APC Cy7             |                         | 7.31                    | 0.18                    |
| AF 700              |                         | 8.9                     |                         |
| PE Cy7              | 0.02                    |                         | 0.19                    |
| PE Texas-Red        | 3.02                    |                         | 0.68                    |
| PerCP Cy5.5         | 3.2                     | 10.79                   |                         |
| PE Cy5              | 4.97                    |                         | 1.72                    |
| PB                  | 1.63                    | 2.35                    | 2.28                    |
| BV 785              | 0.72                    |                         | 0.86                    |
| PE                  | 1.58                    | 0.81                    | 7.25                    |

NA, Not available/applicable.

**TABLE E3.** HIV-infected cohort medication regimen and asthma history

| Age (y) | Viral load | CD4 <sup>+</sup> T-cell counts |      | ART regimen | Asthma status |
|---------|------------|--------------------------------|------|-------------|---------------|
| 3       | UD         | 1456                           | NRTI | Protease    | None          |
| 4       | 79         | 1624                           | NRTI | Integrase   | None          |
| 5       | 299        | 928                            | NRTI | Integrase   | Asthma        |
| 5       | UD         | 1347                           | NRTI | Integrase   | None          |
| 7       | UD         | 2189                           | NRTI | NNRTI       | None          |
| 8       | UD         | 1673                           | NRTI | Integrase   | None          |
| 9       | UD         | 1194                           | NRTI | Protease    | None          |
| 11      | 556        | 1001                           | NRTI | Protease    | None          |
| 12      | UD         | 517                            | NRTI | Integrase   | None          |
| 12      | UD         | 1131                           | NRTI | Integrase   | Asthma        |
| 14      | 23         | 1514                           | NRTI | Protease    | Integrase     |
| 15      | UD         | 1008                           | NRTI | Protease    | Asthma        |
| 15      | 234        | 929                            | NRTI | Protease    | None          |
| 16      | 4842       | 437                            | NRTI | Protease    | Asthma        |
| 16      | UD         | 635                            | NRTI | Integrase   | Asthma        |
| 16      | UD         | 414                            | NRTI | NNRTI       | None          |
| 17      | UD         | 286                            | NRTI | Protease    | None          |
| 17      | UD         | 441                            | NRTI | NNRTI       | None          |
| 18      | 289        | 923                            | NRTI | Protease    | None          |
| 18      | 48         | 442                            | NRTI | NNRTI       | None          |
| 18      | 78         | 394                            | NRTI | Integrase   | None          |
| 19      | 170        | 785                            | NRTI | NNRTI       | None          |
| 19      | UD         | 99                             | NRTI |             | Asthma        |
| 19      | 214        | 444                            | NRTI | Integrase   | None          |
| 19      | 187        | 160                            | NRTI | Integrase   | None          |

*NNRTI*, Non-nucleoside reverse transcriptase inhibitors; *NRTI*, nucleoside reverse transcriptase inhibitors.

**TABLE E4.** Top combinatorial subsets in HIV-infected and HEU pediatric patients

| Cell type                       | HEU                                                                                                                                                              | Percent | HIV+                                                                                                                                                             | Percent |
|---------------------------------|------------------------------------------------------------------------------------------------------------------------------------------------------------------|---------|------------------------------------------------------------------------------------------------------------------------------------------------------------------|---------|
| NK cells                        | DNAM-1 <sup>-</sup> CD8 <sup>-</sup> CD69 <sup>-</sup> NKG2D <sup>-</sup> NKp30 <sup>-</sup> NKp46 <sup>-</sup> NKp44 <sup>-</sup> CD25 <sup>-</sup>             | 6.8     | DNAM-1 <sup>-</sup> CD8 <sup>-</sup> CD69 <sup>-</sup> NKG2D <sup>-</sup> NKp30 <sup>-</sup> NKp46 <sup>-</sup> NKp44 <sup>-</sup> CD25 <sup>-</sup>             | 10.1    |
| CD56 <sup>dim</sup> NK cells    | DNAM-1 <sup>+</sup> CD8 <sup>-</sup> CD69 <sup>-</sup> NKG2D <sup>-</sup> NKp30 <sup>-</sup> NKp46 <sup>-</sup> NKp44 <sup>-</sup> CD25 <sup>-</sup>             | 12.5    | DNAM-1 <sup>+</sup> CD8 <sup>-</sup> CD69 <sup>-</sup> NKG2D <sup>-</sup> NKp30 <sup>-</sup> NKp46 <sup>-</sup> NKp44 <sup>-</sup> CD25 <sup>-</sup>             | 13.2    |
| CD56 <sup>bright</sup> NK cells | DNAM-1 <sup>+</sup> CD8 <sup>-</sup> CD69 <sup>-</sup> NKG2D <sup>-</sup> NKp30 <sup>+</sup> NKp46 <sup>+</sup> NKp44 <sup>-</sup> CD25 <sup>-</sup>             | 20.3    | DNAM-1 <sup>+</sup> CD8 <sup>-</sup> CD69 <sup>-</sup> NKG2D <sup>-</sup> NKp30 <sup>+</sup> NKp46 <sup>+</sup> NKp44 <sup>-</sup> CD25 <sup>-</sup>             | 16.7    |
| NK cells                        | CD16 3G8 <sup>+</sup> CD11a <sup>+</sup> CD11b <sup>+</sup> CD11c <sup>+</sup> CD18 <sup>+</sup> CD54 <sup>+</sup> CD244 <sup>+</sup> CD2 <sup>+</sup>           | 26.7    | CD16 3G8 <sup>+</sup> CD11a <sup>+</sup> CD11b <sup>+</sup> CD11c <sup>+</sup> CD18 <sup>+</sup> CD54 <sup>+</sup> CD244 <sup>+</sup> CD2 <sup>+</sup>           | 34.9    |
| CD56 <sup>dim</sup> NK cells    |                                                                                                                                                                  | 26.3    |                                                                                                                                                                  | 34.9    |
| CD56 <sup>bright</sup> NK cells |                                                                                                                                                                  | 29.2    | CD16 3G8 <sup>-</sup> CD11a <sup>+</sup> CD11b <sup>+</sup> CD11c <sup>+</sup> CD18 <sup>+</sup> CD54 <sup>+</sup> CD244 <sup>+</sup> CD2 <sup>+</sup>           | 30.9    |
| NK cells                        | KIR2DL1 <sup>-</sup> CD158b <sup>-</sup> CD158e <sup>-</sup> KIR2DS4 <sup>-</sup> CD94 <sup>+</sup> NKG2A <sup>+</sup> NKG2C <sup>-</sup> KLRG1 <sup>-</sup>     | 23      | KIR2DL1 <sup>-</sup> CD158b <sup>-</sup> CD158e <sup>-</sup> KIR2DS4 <sup>-</sup> CD94 <sup>+</sup> NKG2A <sup>+</sup> NKG2C <sup>-</sup> KLRG1 <sup>-</sup>     | 20.8    |
| CD56 <sup>dim</sup> NK cells    |                                                                                                                                                                  | 20.3    |                                                                                                                                                                  | 17.3    |
| CD56 <sup>bright</sup> NK cells |                                                                                                                                                                  | 46.9    |                                                                                                                                                                  | 49.2    |
| NK cells                        | CD16 3G8 <sup>+</sup> CD11b <sup>+</sup> <b>CD57</b> <sup>+</sup> CD94 <sup>+</sup> CD62L <sup>-</sup> CD27 <sup>-</sup> CD117 <sup>-</sup> CD122 <sup>+</sup>   | 16.9    | CD16 3G8 <sup>+</sup> CD11b <sup>+</sup> <b>CD57</b> <sup>-</sup> CD94 <sup>+</sup> CD62L <sup>-</sup> CD27 <sup>-</sup> CD117 <sup>-</sup> CD122 <sup>+</sup>   | 15.3    |
| CD56 <sup>dim</sup> NK cells    |                                                                                                                                                                  | 17.8    |                                                                                                                                                                  | 16.3    |
| CD56 <sup>bright</sup> NK cells | CD16 3G8 <sup>+</sup> CD11b <sup>+</sup> CD57 <sup>-</sup> CD94 <sup>+</sup> CD62L <sup>+</sup> CD27 <sup>+</sup> CD117 <sup>-</sup> CD122 <sup>+</sup>          | 22.9    | CD16 3G8 <sup>+</sup> CD11b <sup>+</sup> CD57 <sup>-</sup> CD94 <sup>+</sup> CD62L <sup>+</sup> CD27 <sup>+</sup> CD117 <sup>-</sup> CD122 <sup>+</sup>          | 19.2    |
| NK cells                        | Perf D48 <sup>+</sup> Perf δG9 <sup>+</sup> Granzyme <sup>+</sup> CD107a <sup>-</sup> IFN-γ <sup>-</sup> TNF-α <sup>-</sup> IL-5 <sup>-</sup> IL-13 <sup>-</sup> | 65.6    | Perf D48 <sup>+</sup> Perf δG9 <sup>+</sup> Granzyme <sup>+</sup> CD107a <sup>-</sup> IFN-γ <sup>-</sup> TNF-α <sup>-</sup> IL-5 <sup>-</sup> IL-13 <sup>-</sup> | 62.6    |
| CD56 <sup>dim</sup> NK cells    |                                                                                                                                                                  | 68.5    |                                                                                                                                                                  | 65.8    |
| CD56 <sup>bright</sup> NK cells |                                                                                                                                                                  | 32.3    |                                                                                                                                                                  | 32.2    |

Marker distinguishing top NK cell developmental subset between HIV-infected and HEU is highlighted in boldface.  
KLRG1, Killer cell lectin-like receptor subfamily G member 1.
